# Supplementary material for: Performance evaluation of a yeast biorefinery as a sustainable model for co-production of biomass, bioemulsifier, lipid, biodiesel and animal-feed components using inexpensive raw materials
Source: Royal Society of Chemistry journal article supplement (doi:10.1039/c7se00010c), 2017-01-01
Supplement: c7se00010c1.pdf [file c7se00010c1.pdf]

## SUPPORTING INFORMATION

### Performance evaluation of a yeast biorefinery as a sustainable model for co-production of biomass, bioemulsifier, lipid, biodiesel and animal-feed components using inexpensive raw materials

RaviRanjan Kumar<sup>a</sup>, Gunaseelan Dhanarajan<sup>a</sup>, Moumita Bhaumik<sup>a</sup>, Jayita Chopra<sup>a,b</sup> and Ramkrishna Sen<sup>\*a</sup>

<sup>a</sup> Department of Biotechnology, Indian Institute of Technology Kharagpur, West Bengal-721302, India

<sup>b</sup> P.K. Sinha Center for Bioenergy, Indian Institute of Technology Kharagpur-721302, West Bengal, India

\*Corresponding author: rksen@yahoo.com ; Tel: +91-3222-283752

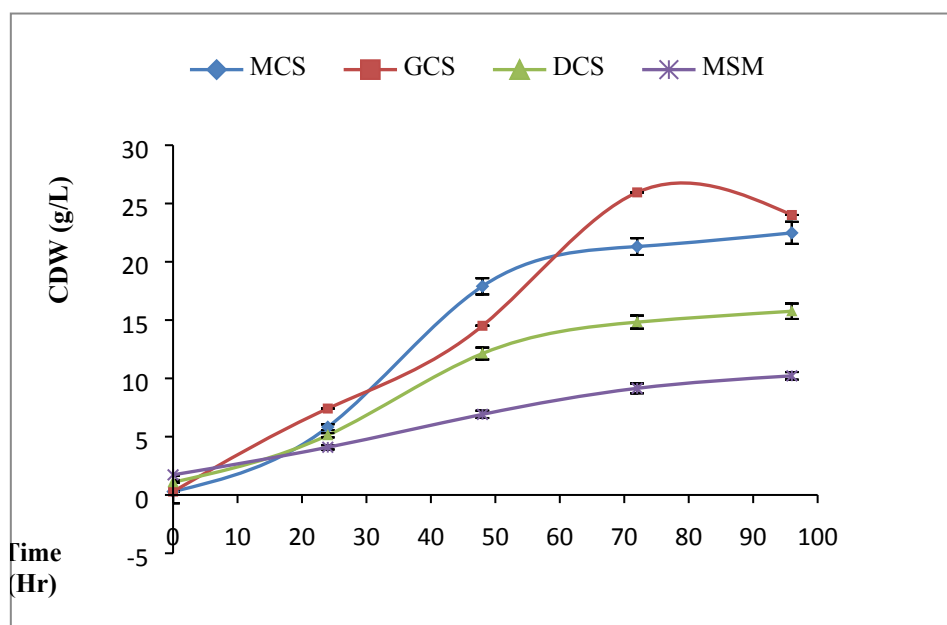

**Figure S1** . Time course growth profile of *P. guilliermondii* in grown in different media combinations

**Table T 1.** Cost of media component utilized for production of yeast lipid

| Media component                              | Cost (INR/Kg) | Cost (USD/kg) |
|----------------------------------------------|---------------|---------------|
| Molasses*                                    | 8.01          | 0.120         |
| CSL <sup>#</sup>                             | 7.0           | 0.105         |
| DWW <sup>§</sup>                             | 0.00          | 0.00          |
| Crude glycerol <sup>¶</sup> , <sup>¶</sup> € | 6.67          | 0.100         |
| Refined glycerol                             | 530           | 7.95          |
| KH <sub>2</sub> PO <sub>4</sub> *            | 80.12         | 1.20          |
| K <sub>2</sub> HPO <sub>4</sub> *            | 76.05         | 1.05          |
| MgSO <sub>4</sub> *                          | 4.67          | 0.07          |
| NaCl*                                        | 4.0           | 0.06          |
| CaCl <sub>2</sub> .2H <sub>2</sub> O*        | 6.67          | 0.10          |

CSL-corn Steep Liquor, DWW- Distillery waste water

\*Based on the current Indian market price sourced from where it was procured.

<sup>#</sup>The Times of India (2017). Amul hikes milk procurement prices for farmers. Accessed on February 24, 2017 from <http://epaperbeta.timesofindia.com/Article.aspx?eid=31805&articlexml=Amul-hikes-milk-procurement-prices-for-farmers-05022017007005>

<sup>#</sup>Based on the current Indian market price sourced from the concerned industry from where it was procured (Shukhjit Starch and Chemicals Ltd, Malda, West Bengal).

<sup>§</sup> DWW was obtained free of cost .

<sup>¶</sup> Kerr BJ, Dozier WA, Bregendahl K: Nutritional value of crude glycerine for non-ruminants. Proceedings of the 23rd Annual Carolina Swine Nutrition Conference. 2007, Raleigh, NC, 6-18.

<sup>¶</sup>F. X. Yang, M. A. Hanna and R. C. Sun, *Biotechnol Biofuels*, 2012, **5**.

and increasing at 5°C min<sup>-1</sup> to 180°C for 10 min and 6 °C min<sup>-1</sup> to 220 °C for 11 min.

Table T 2. Composition of the crude glycerol

| Component    | Concentration<br>(% w/w) |
|--------------|--------------------------|
| Fat          | 9.74                     |
| Carbohydrate | 76.4                     |
| Protein      | 0.06                     |
| Ash          | 2.5                      |
| Moisture     | 10.8                     |

Table T3. Characteristics of CSL

| Property         | concentration |
|------------------|---------------|
| Density          | 1.22          |
| Protein (%)      | 43.8          |
| Carbohydrate (%) | 13.32         |
| Ash (%)          | 10.28         |
| Dry matter       | 50            |

Table T4.Characteristics of Molasses

| Composition                                 | Concentration<br>(% w/w) |
|---------------------------------------------|--------------------------|
| Non reducing sugar<br>(Sucrose)             | 28                       |
| Reducing sugar<br>(glucose and<br>fructose) | 19                       |
| Other carbohydrate                          | 8.52                     |
| Crude Proteins                              | 12.45                    |
| Salt                                        | 11.56                    |
| Water                                       | 19.86                    |

Table T5.Characteristics of Distillery waste water (DWW)

| Property | Concentration<br>(mg/L) |
|----------|-------------------------|
| TSS      | 15767                   |
| TS       | 18900                   |
| COD      | 62370                   |
| BOD      | 39000                   |

TSS-Total suspended solid, TS- Total solid, COD- Chemical oxygen Demand, BOD- Biological oxygen demand.
